# Supplementary material
Source: PubMed Central journal article supplement (PMC9525016)
Supplement: btac558_supplementary_data.pdf [file btac558_supplementary_data.pdf]

# A Spatial Attention Guided Deep Learning System for Prediction of Pathological Complete Response Using Breast Cancer Histopathology Images

HONGYI DUANMU<sup>1,\*</sup>, SHRISTI BHATTARAI<sup>2</sup>, HONGXIAO LI<sup>11</sup>, ZHAN SHI<sup>1</sup>, FUSHENG WANG<sup>1,3</sup>, GEORGE TEODORO<sup>4</sup>, KEERTHI GOGINENI<sup>5,6,7</sup>, PREETI SUBHEDAR<sup>7</sup>, UMay KIRAZ<sup>8</sup>, EMIEL A.M. JANSSEN<sup>8,9</sup>, RITU ANEJA<sup>10</sup>, AND JUN KONG<sup>11,12\*</sup>

<sup>1</sup>Department of Computer Science, Stony Brook University, NY, USA, <sup>2</sup>Department of Biology, Georgia State University, Atlanta, GA, USA, <sup>3</sup>Department of Biomedical Informatics, Stony Brook University, NY, USA, <sup>4</sup>Department of Computer Science, Federal University of Minas Gerais, MG, Brazil, <sup>5</sup>Department of Hematology-Medical Oncology, Winship Cancer Institute, Emory University School of Medicine, GA, USA, <sup>6</sup>Department of Surgery, Winship Cancer Institute, Emory University School of Medicine, GA, USA, <sup>7</sup>Georgia Cancer Center for Excellence, Grady Health System, <sup>8</sup>Department of Pathology, Stavanger University Hospital, Stavanger, Norway, <sup>9</sup>Department of Chemistry, Bioscience and Environmental Engineering, University of Stavanger, Norway, <sup>10</sup>School of Health Professions, University of Alabama at Birmingham, AL, USA, <sup>11</sup>Department of Mathematics and Statistics and Computer Science, Georgia State University, GA, USA, and <sup>12</sup>Winship Cancer Institute, Emory University, GA, USA

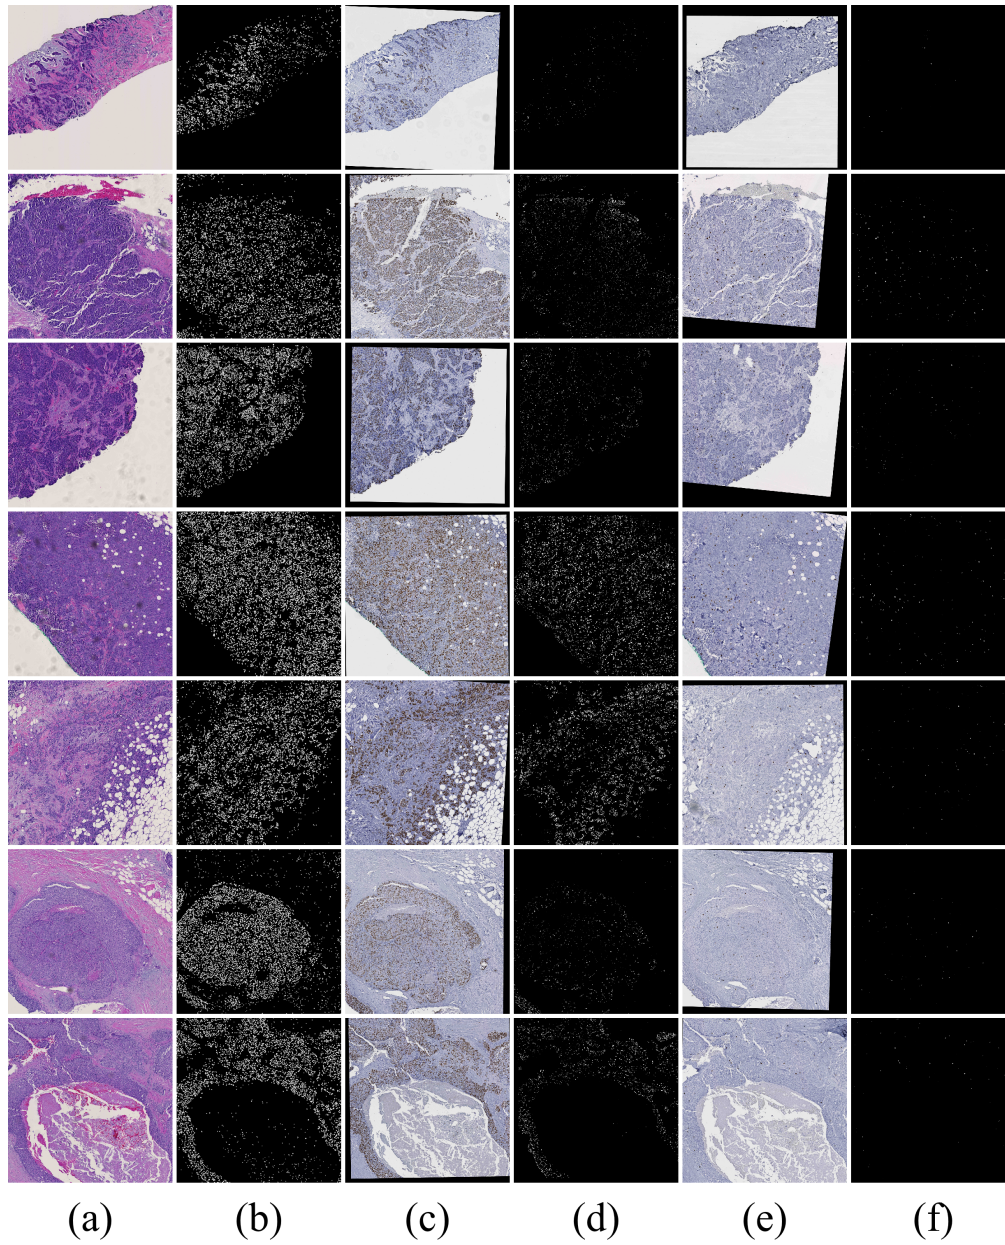

**Fig. S1.** Typical results of image registration, tumor cell segmentation, and biomarker segmentation. (a) original HE images; (b) segmented tumor cells from HE images, (c) registered Ki-67 images; (d) identified Ki-67 biomarkers, (e) registered PHH3 images; and (f) identified PHH3 markers.
